# Supplementary material for: Characterization of polymethoxyflavone demethylation during drying processes of citrus peels
Source: Royal Society of Chemistry journal article supplement (doi:10.1039/c9fo01053j), 2019-01-01
Supplement: c9fo01053j1.pdf [file c9fo01053j1.pdf]

1        **Characterization of polymethoxyflavone demethylation**  
2                    **during drying processes of citrus peels**

3   Huijuan Zhang<sup>1</sup>, Guifang Tian<sup>1,#</sup>, Chengying Zhao<sup>1</sup>, Yanhui Han<sup>2</sup>, Christina DiMarco-  
4   Crook<sup>2</sup>, Chang Lu<sup>1</sup>, Yuming Bao<sup>1</sup>, Chengxiu Li<sup>1</sup>, Hang Xiao<sup>2,\*</sup>, Jinkai Zheng<sup>1,\*</sup>

5   <sup>1</sup> Institute of Food Science and Technology, Chinese Academy of Agricultural  
6   Sciences, Beijing 100193, China

7   <sup>2</sup> Department of Food Science, University of Massachusetts, Amherst, MA 01003,  
8   United States

9   Correspondence to: Jinkai Zheng; Hang Xiao.

10   E-mail: [zhengjinkai@caas.cn](mailto:zhengjinkai@caas.cn) (J. Zheng); [hangxiao@foodsci.umass.edu](mailto:hangxiao@foodsci.umass.edu) (H. Xiao)

## 12 **Contents**

|    |                                                                                                     |          |
|----|-----------------------------------------------------------------------------------------------------|----------|
| 13 | <b>Fig. S1</b> The drying curves (a), and the demethylation ratios of sinensetin (b), nobiletin     |          |
| 14 | (c), heptamethoxyflavone (d) and tangeretin (e) in <i>valencia orange</i> peels                     |          |
| 15 | during HAD process.....                                                                             | <b>3</b> |
| 16 | <b>Fig. S2</b> The drying curves and demethylation ratios of PMFs (sinenseti, nobiletin,            |          |
| 17 | heptamethoxyflavone and tangeretin) in <i>hybrid citrus</i> peels during VFD (a, c)                 |          |
| 18 | and SD (b, d) processes.....                                                                        | <b>4</b> |
| 19 | <b>Fig. S3</b> The drying curves and demethylation ratios of 4 PMFs in <i>valencia orange</i> peels |          |
| 20 | during VFD (a, c) and SD (b, d)                                                                     |          |
| 21 | processes.....                                                                                      | <b>5</b> |

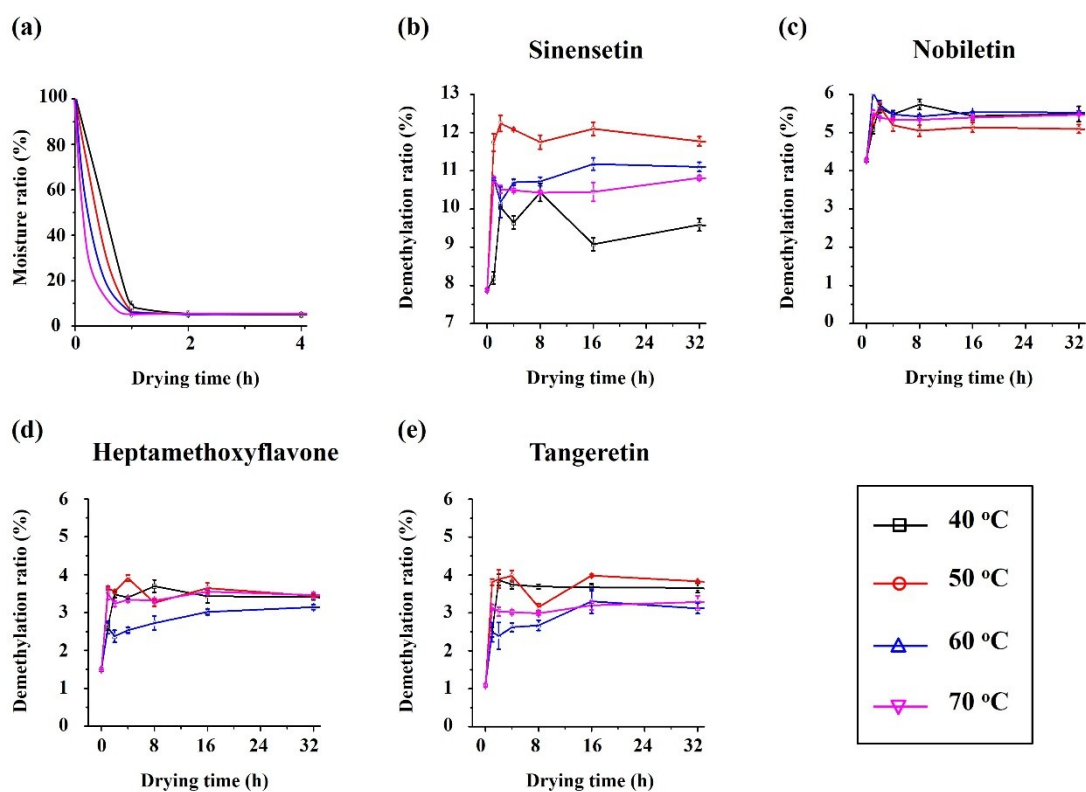

22

23 **Fig. S1** The drying curves (a), and the demethylation ratios of sinensetin (b), nobiletin  
 24 (c), heptamethoxyflavone (d) and tangeretin (e) in *valencia orange* peels  
 25 during HAD process.

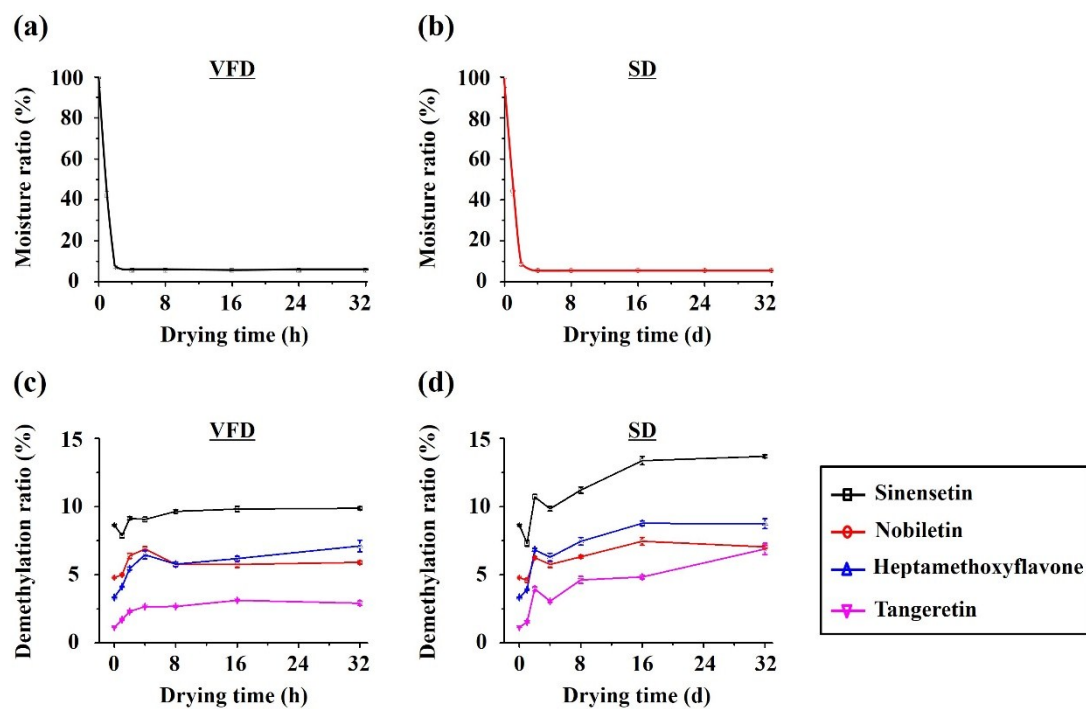

26

27 **Fig. S2** The drying curves and demethylation ratios of PMFs (sinenseti, nobiletin,  
 28 heptamethoxyflavone and tangeretin) in *hybrid citrus* peels during VFD (a, c)  
 29 and SD (b, d) processes.

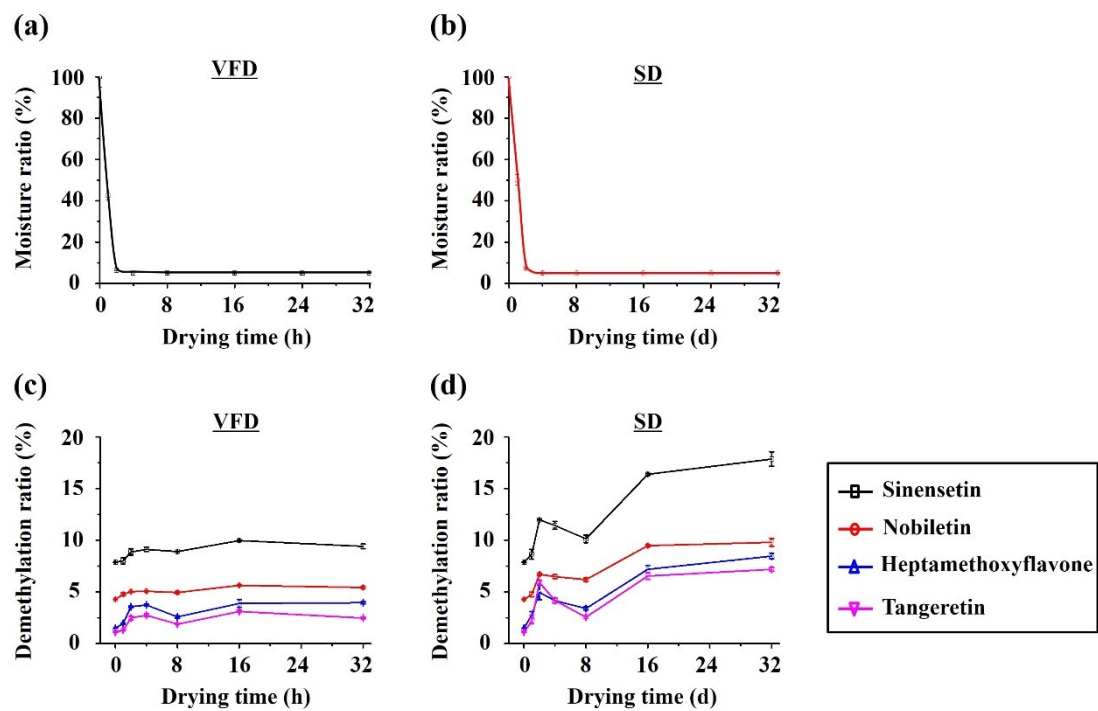

31 **Fig. S3** The drying curves and demethylation ratios of 4 PMFs in *valencia orange* peels  
 32 during VFD (a, c) and SD (b, d) processes.
